# Supplementary material
Source: MDPI journal article supplement (https://www.mdpi.com/2076-3263/13/3/85)
Supplement: s1 [file s1]

Supplementary Materials:

**Table S1.** Mount Siple age scale markers. Each marker represents the winter trough (July in the Southern Hemisphere).

| Point | Depth  | Year |
|-------|--------|------|
| 1     | 0.2129 | 2016 |
| 2     | 1.321  | 2015 |
| 3     | 2.509  | 2014 |
| 4     | 3.954  | 2013 |
| 5     | 5.206  | 2012 |
| 6     | 6.426  | 2011 |
| 7     | 7.376  | 2010 |
| 8     | 8.83   | 2009 |
| 9     | 10.38  | 2008 |
| 10    | 11.79  | 2007 |
| 11    | 13.22  | 2006 |
| 12    | 14.06  | 2005 |
| 13    | 15.52  | 2004 |
| 14    | 17.18  | 2003 |
| 15    | 18.49  | 2002 |
| 16    | 20.08  | 2001 |
| 17    | 21.57  | 2000 |
| 18    | 22.82  | 1999 |
| 19    | 24.11  | 1998 |
